# Supplementary material
Source: publisher figshare collection journal article supplement (https://gsajournals.figshare.com/ndownloader/files/27930249)
Supplement: Supplementary file 1 [file 27930249]

**Supplementary Figures**


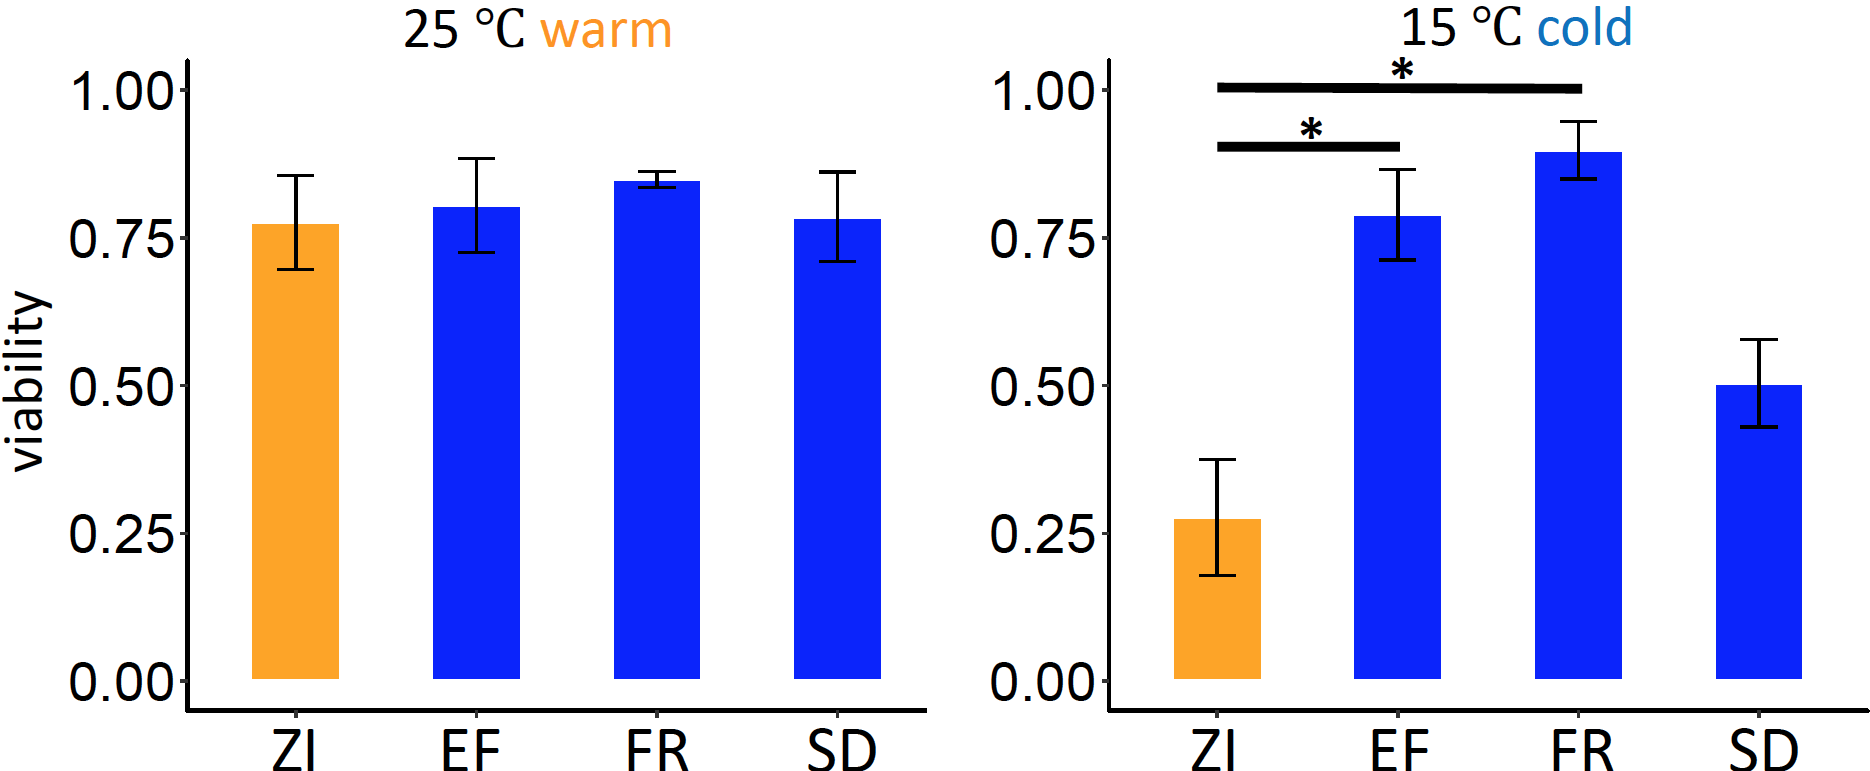


Fig S1. Egg-to-adult viability for the ancestral range warm-adapted population (ZI) and the cold-adapted populations (EF, FR and SD) at different temperatures. * indicates the survival is significantly different (p < 0.05). Error bars show the standard error based on three strains.


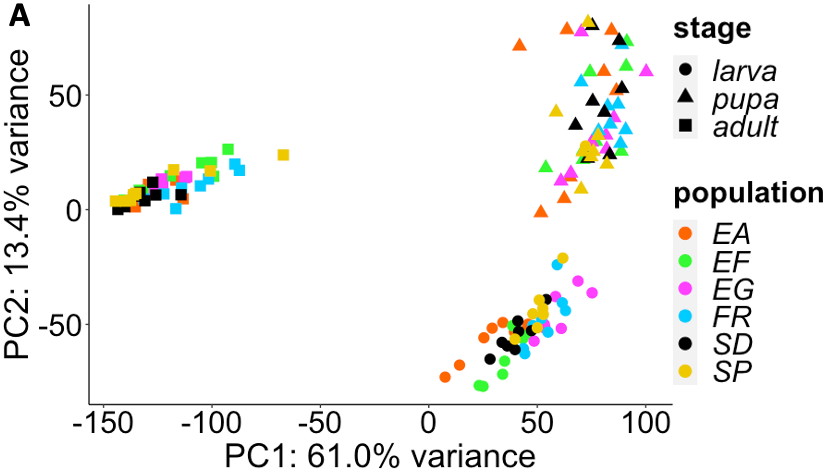


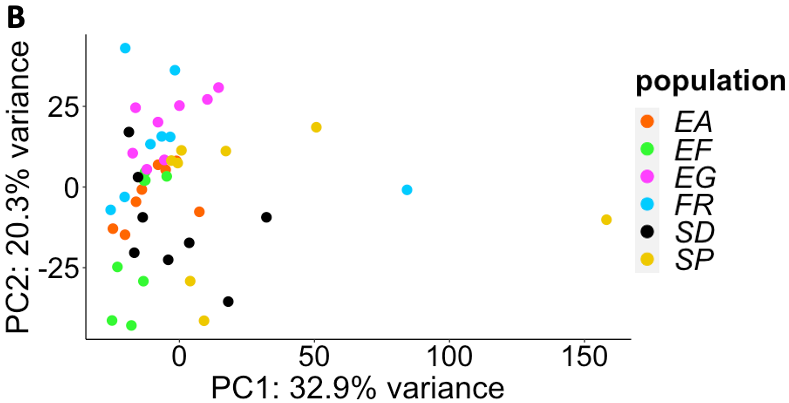


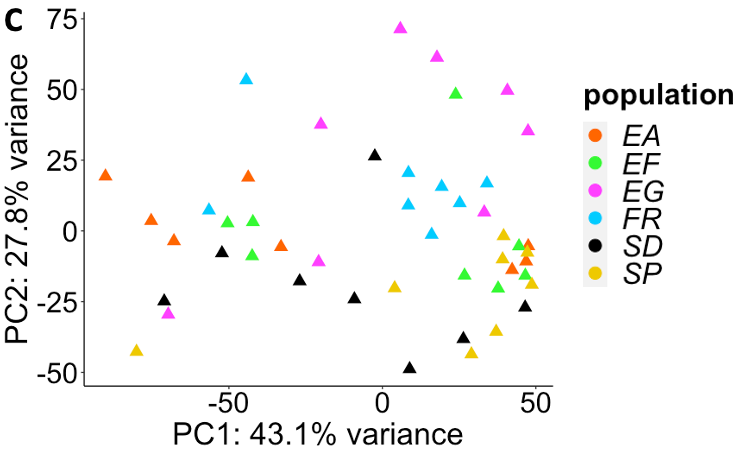


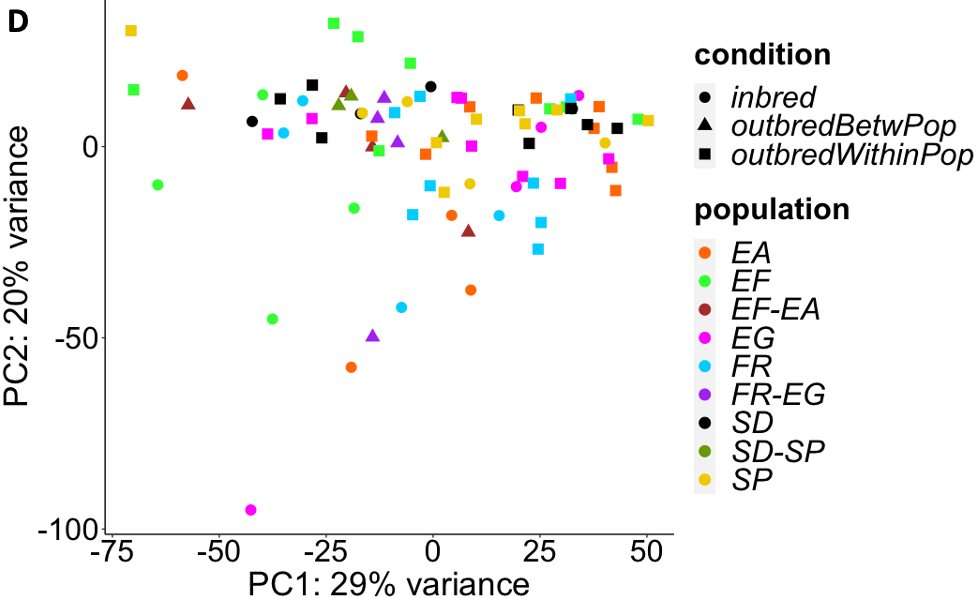


Fig. S2. The PCA plots for transcriptome abundance. (A) The PC1 and PC2 for F1 samples from within-population crosses at three developmental stages. (B) The first two PCs for larva samples. (C) The first two PCs for pupa samples. (D) The first two PCs for adult samples, including F1 from within population crosses, F1 from between population crosses and parental inbred lines.


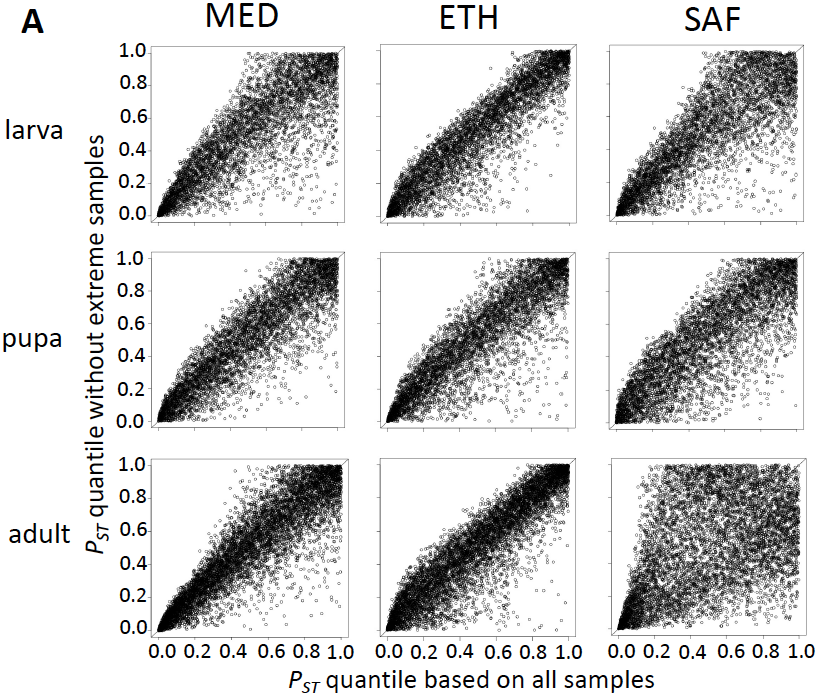


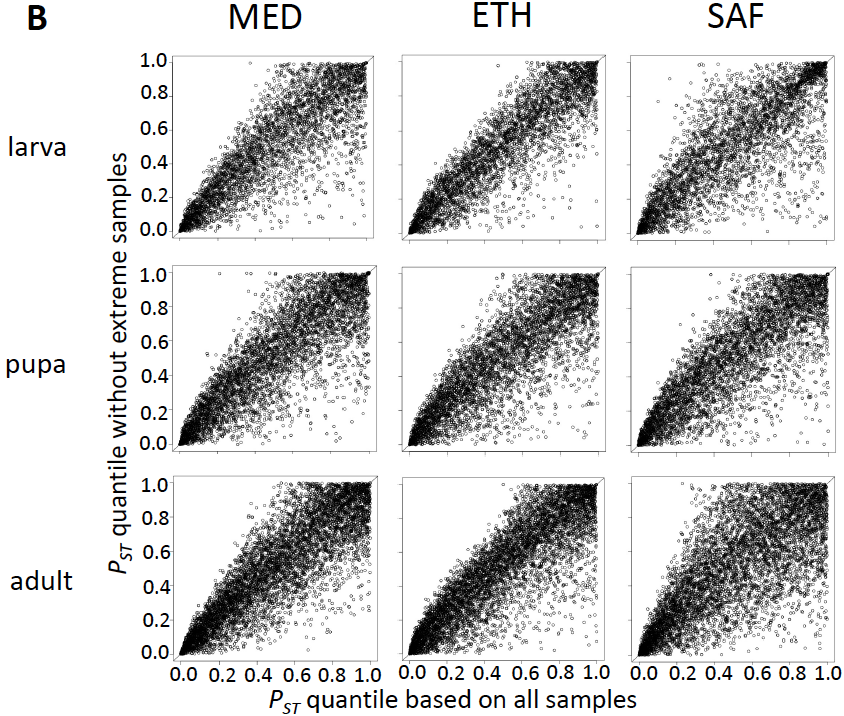


Fig S3. *PST* quantiles based on all crosses (x-axis) versus *PST* quantiles based on data excluding extreme samples (y-axis) in different population pairs and developmental stages for expression abundance (A) and intron usage (B).


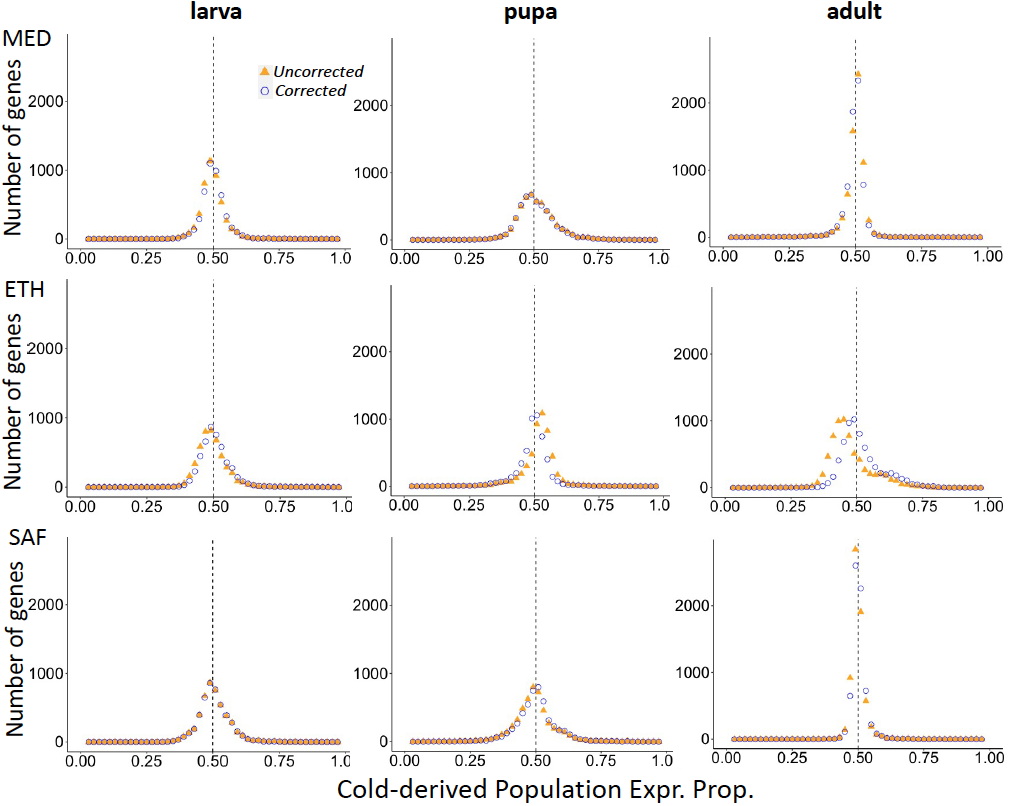


Fig. S4. The effects of correcting for transcriptome-wide skew are illustrated. Panels show the number of genes for different cold-derived population expression proportion levels at three developmental stages across populations. The orange triangle indicates the number for the uncorrected values and the blue dot indicates the number for the values corrected by mean expression ratio between cold- and warm-derived populations.


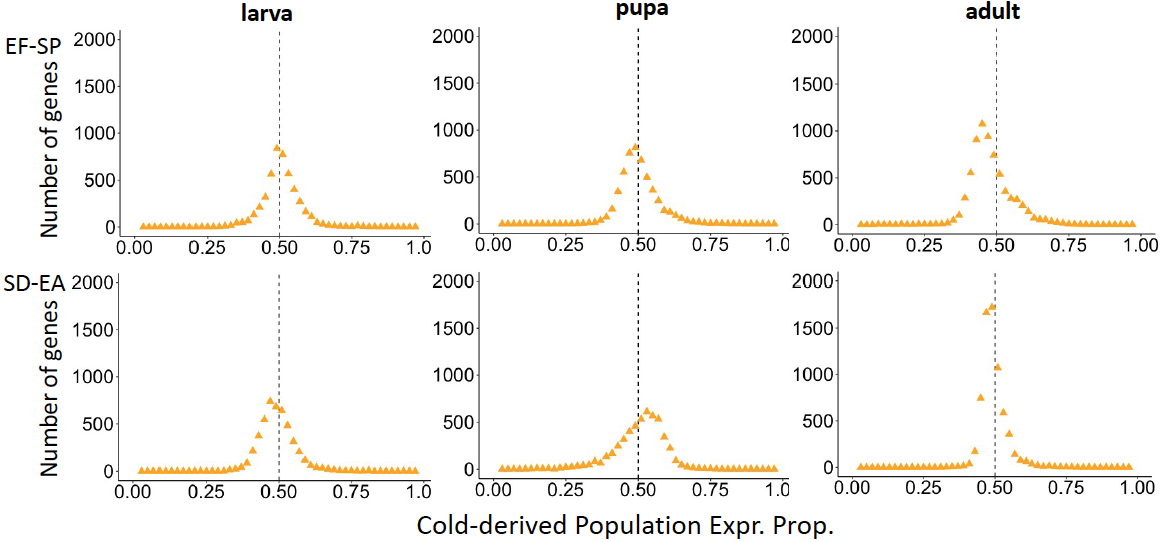
 Fig. S5. Ethiopian populations were paired with South African counterparts to assess which population was most responsible for ETH transcriptome-wide skew.  These comparisons suggest the transcriptome-wide shift in expression for the adult stage in ETH was mainly caused by the EF population while the shift for pupal stage was mainly caused by the EA population. Distributions of the cold-derived population expression proportion for EF-SP comparisons and SD-EA comparisons are shown. For the adult stage, because EF-EA (Fig. S4) and EF-SP comparisons showed the expression shift while SD-SP (Fig. S4) and SD-EA comparison did not, the EF population probably causes the shift for this stage. Similarly, EA is likely to cause the shift observed for the pupal stage.


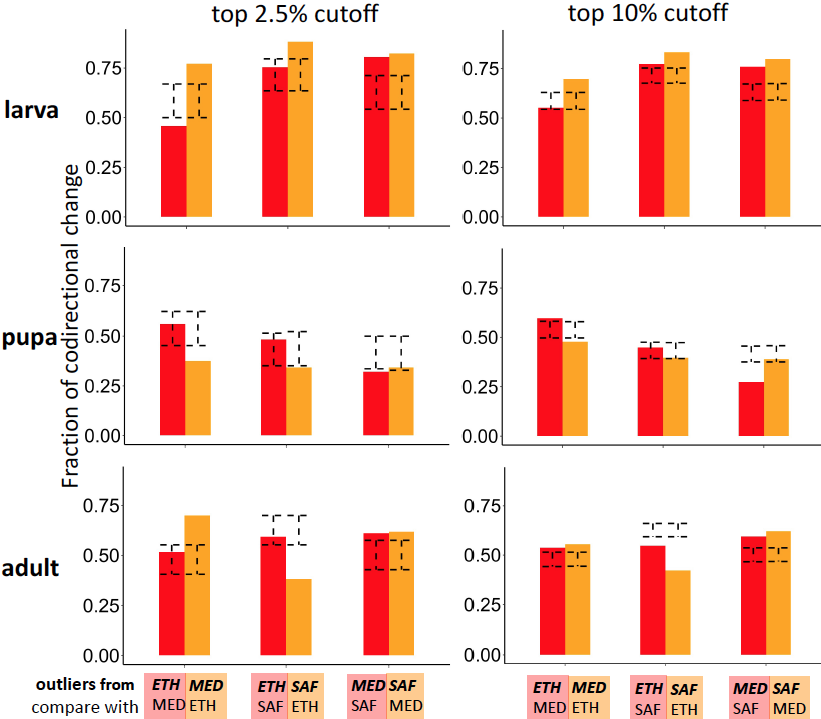


Fig. S6. Fractions of co-directional gene expression changes between two pairs for the top 2.5% or top 10% *PST* outliers identified in one of the pairs. The dashed error bars indicate the 95% confidence interval for the fraction of co-directional expression changes in permuted data. If the real data is outside the range of the error bar, it indicates the fraction is significantly different from random expectation (p < 0.05, two-side test based on permuted distribution).


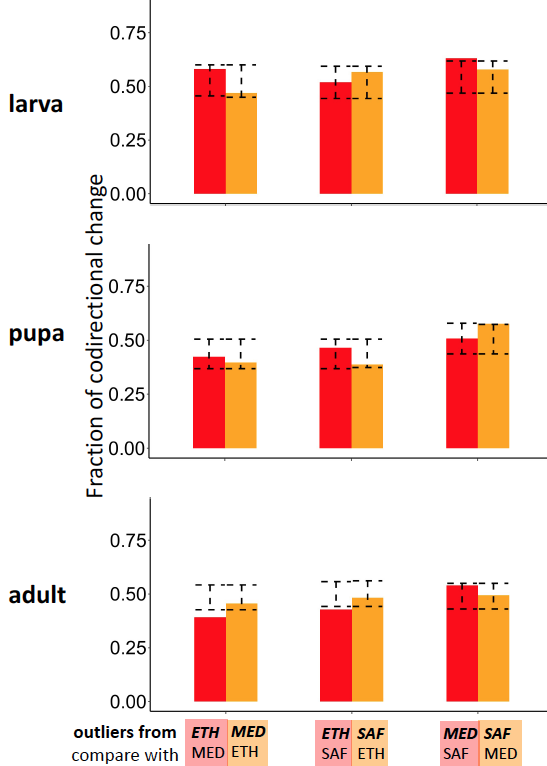


Fig. S7. Fractions of co-directional intron usage changes in two population pairs for the *PST* outliers identified in one of the pairs. The dashed error bar indicates 95% confidence interval for the fraction of co-directional expression changes in permuted data. If the real data is outside the range of the error bar, it indicates the fraction is significantly different from random expectation (p < 0.05, two-side test based on permuted distribution).


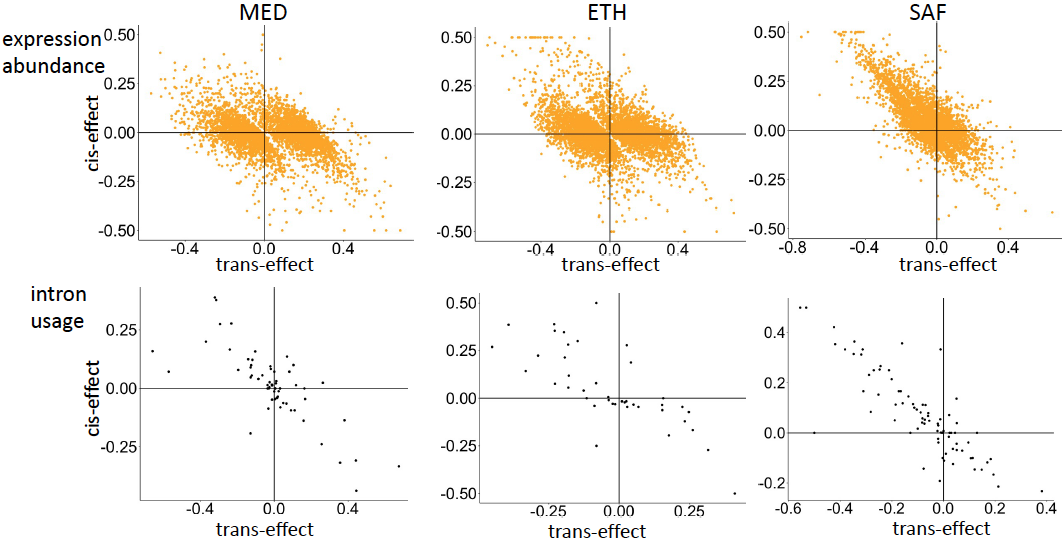


Fig. S8. The *cis*- and *trans*-effects within each population pair for expression abundance (upper panel) and intron usage (lower panel).


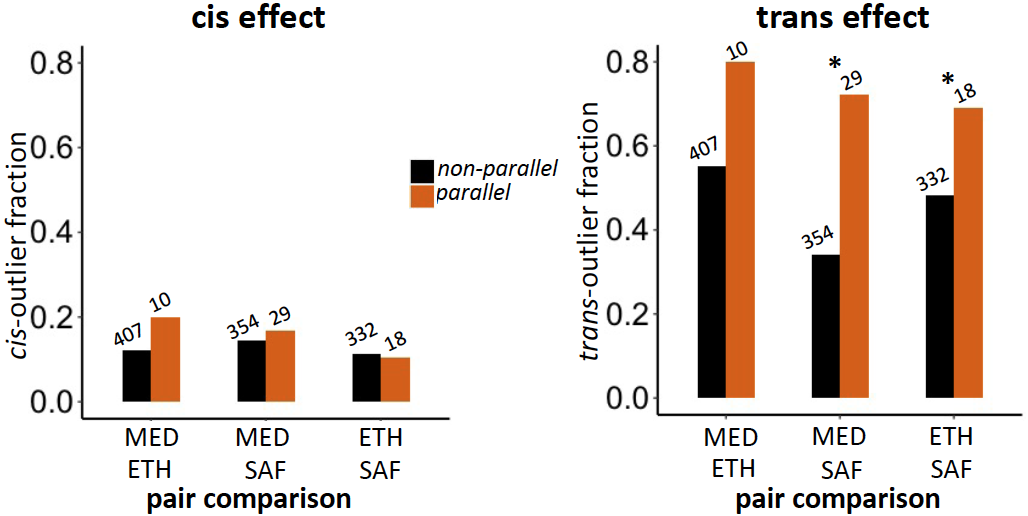


Fig. S9. *Trans-*regulatory changes show greater parallelism than *cis-* changes. Here the “parallel” category is the shared outliers with co-directional changes between pairs. The “non-parallel” category includes the shared outliers with anti-directional changes and the non-shared outliers (outliers in only one pair). The fraction of genes with significant *cis-/trans*-effect in at least one of the two pairs in each category for each comparison is shown. The number above the bar shows the denominator of the fraction. The demonminators are the same for *cis*-effects and *trans-*effects. * indicates the fractions are significantly different between *PST* outliers and non-outliers (p < 0.005, Fisher's Exact Tests).


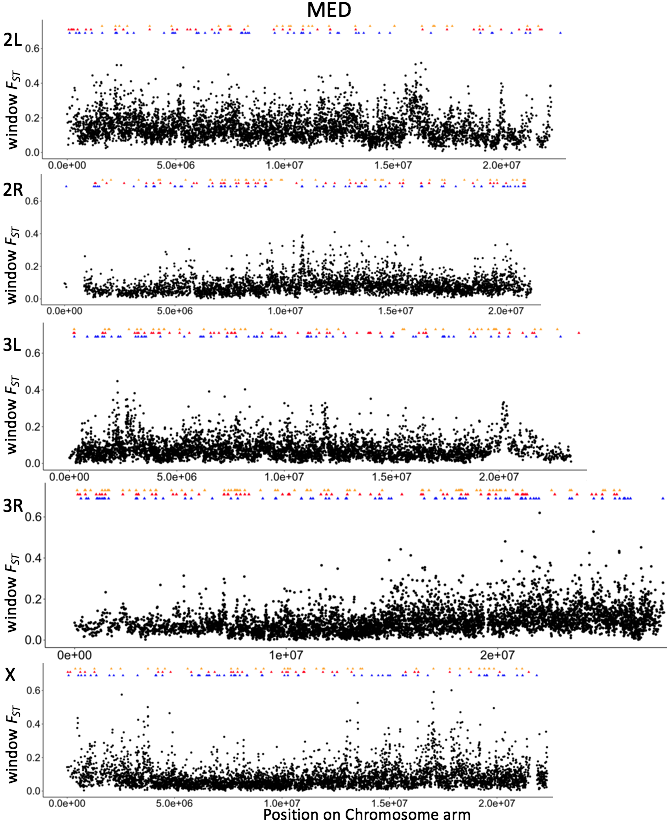


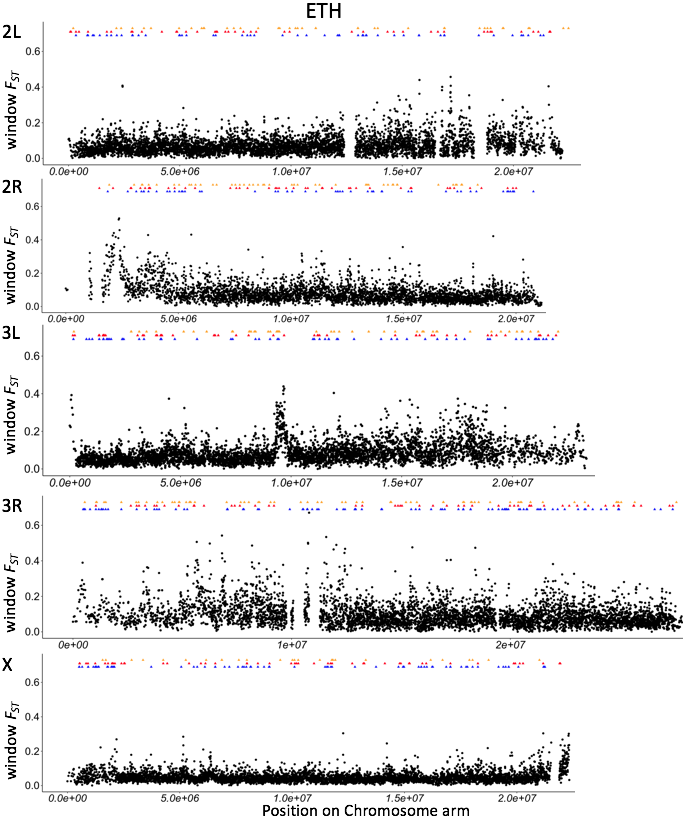


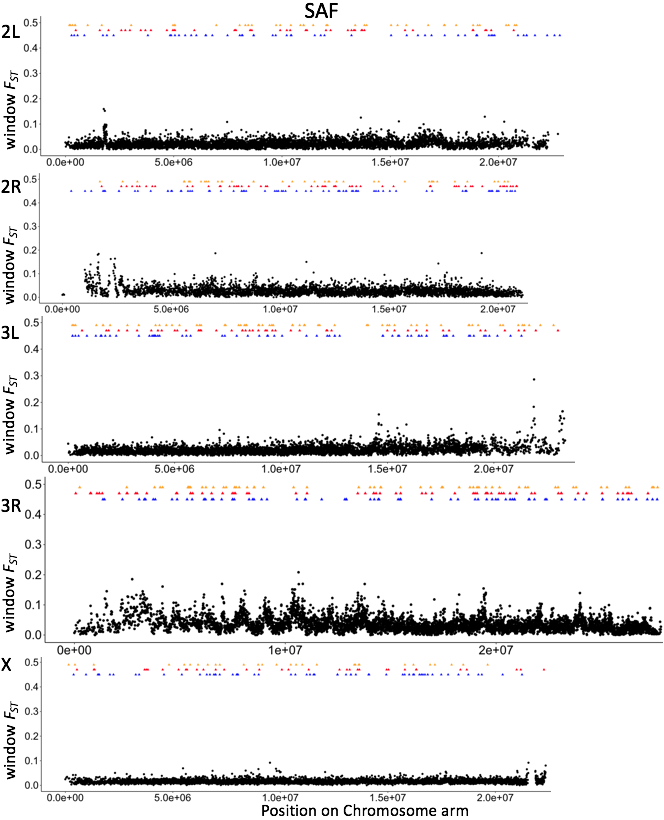


Fig S10. Window *FST* values (black dots) between the cold- and warm-derived population for the MED, ETH and SAF pairs, across five major chromosome arms. The triangles on top of the plots show the locations of the *PST* outliers for larva (orange), pupa (red) and adult (blue).

**Supplementary Tables and Legends**

Table S1. The inversion information for the lines used in this experiment.

Table S2. The numbers of reads (75bp paired-end) generated for each sample.

Table S3. The egg-to-adult viability for ZI and cold-derived populations in warm and cold environments.

Table S4. The *PST* values and the expression values in each population for all genes for different developmental stages in different population pairs.

Table S5. The adjusted *PST* quantiles for all intron usages and the genes they belong to for different developmental stages in different population pairs.

Table S11. The Pearson correlation coefficients (upper triangular matrix) of gene expression among eight outbred samples between pairwise outliers for each cold-derived population. The corresponding cells in the lower triangular matrix are the p-values based on random permutations.

| Pair | MED | | ETH | | SAF | |
| --- | --- | --- | --- | --- | --- | --- |
| Population | warm | cold | warm | cold | warm | cold |
| *Vinbred* | 10507 | 6235 | 20863 | 16998 | 6010 | 8656 |
| *Voutbred* | 2482 | 3284 | 2311 | 8256 | 1446 | 9689 |
| *PST_inbred* | 0.14 | | 0.21 | | 0.10 | |
| *PST_outbred* | 0.17 | | 0.11 | | 0.21 | |

Table S6. Average expression variance among the inbred and outbred samples in warm- and cold-derived populations and the average *PST* for the inbred and outbred samples between populations.

| 2.5% cutoff | larva | | pupa | | adult | |
| --- | --- | --- | --- | --- | --- | --- |
| Population pairs | MED | SAF | MED | SAF | MED | SAF |
| ETH | 1.7%  (1.7%) | 2.5%  (1.7%) | **3.9%**  (1.6%) | 0%  (0.8%) | 2.4%  (1.2%) | **5.9%**  (1.2%) |
| SAF | **5.9%**  (1.7%) |  | 0%  (0.8%) |  | **2.9%**  (1.2%) |  |

| 10% cutoff | larva | | pupa | | adult | |
| --- | --- | --- | --- | --- | --- | --- |
| Population pairs | MED | SAF | MED | SAF | MED | SAF |
| ETH | 5.5%  (5.8%) | 8.7%  (7.0%) | 5.7%  (5.3%) | 3.3% (4.3%) | 5.3%  (4.7%) | **13.1%**  (6.2%) |
| SAF | **11.9%**  (6.2%) |  | **0.4%**  (4.1%) |  | **10.9%**  (5.0%) |  |

Table S7. The percentages of genes with parallel expression abundance changes for the top 2.5% and top 10% *PST* cutoff. The random expectation is the median of the permuted proportions (in brackets). The majority of proportions were higher than the expectation, with larva and adult stages showing stronger patterns than the pupa. Those that were significantly different from the random expectation are in bold (permutationtest, p < 0.01).

| Population pairs | MED | | ETH | | SAF | |
| --- | --- | --- | --- | --- | --- | --- |
| stages | Larva (235) | Pupa (255) | Larva (235) | Pupa (255) | Larva (235) | Pupa (255) |
| Adult (229) | 0.9%  (1.3%) | 0.3%  (1.3%) | **3.8%**  (1.5%) | 0.6% (1.2%) | 1.5%  (1.5%) | 1.2%  (1.8%) |
| Pupa (255) | **11.4%**  (2.7%) |  | 1.6%  (2.4%) |  | 0.4%  (1.2%) |  |

Table S8. The percentages of genes with parallel expression changes between pairwise developmental stages. The numbers of outlier genes used in the comparison are indicated next to the stage names (in brackets). The random expectation is the median of the permuted proportions (in brackets). Those that were significantly different from the random expectation are in bold (permutationtest, p < 0.01).

| Expression abundance | MED | ETH | SAF |
| --- | --- | --- | --- |
| larva | | *CG14830* | | --- | | *Irk1* | | *D1* | | *AMPdeam* | | *Idh3a* | | *ATPsynCF6* | | *Cftr* | | *smash* | | *Ufd4* | | *Hrb87F* | | *CG17841* | | *Ran* | | *Ntf-2* | | *S2P* | | *CG15308* | | *blw* | | *onecut* | | *CG8223* | | *CG1673* | | *UbcE2M* | | | *Cds* | | --- | | *Tango11* | | *Kap3* | | *Srp54k* | | *ari-1* | | *CG30394* | | *Nrd1* | | *ClpX* | | *Spn43Aa* | | *CG17385* | | *Hph* | | *TMEM216* | | *CG45049* | | *Cftr* | | *mbf1* | | *unc-45* | | *Tbce* | | *cu* | | *Ns2* | | *lqfR* | | | *cpa* | | --- | | *Best2* | | *yip2* | | *lncRNA:cherub* | | *twr* | | *mus201* | | *Irp-1B* | | *pros* | | *alphaCOP* | | *CG6024* | | *parvin* | | *Hsc70-3* | | *toy* | | *klg* | | *CG6409* | | *Myo61F* | | *msi* | | *Aef1* | | *unc-119* | | *FBgn0015323* | |
| pupa | | *Pex19* | | --- | | *Sgt* | | *frac* | | *aru* | | *Ugt50B3* | | *CG2233* | | *kat80* | | *Mondo* | | *Diap2* | | *dbr* | | *CG11902* | | *srl* | | *CG11970* | | *CG9795* | | *Vps13D* | | *chico* | | *IscU* | | *CG5112* | | *Grip163* | | *CG4603* | | | *pdgy* | | --- | | *RtGEF* | | *PhKgamma* | | *Herc4* | | *Tsp42Ef* | | *trbd* | | *7SLRNA:CR42652* | | *AcCoAS* | | *lncRNA:CR42862* | | *CG3308* | | *Nhe3* | | *Nak* | | *Nep3* | | *Vinc* | | *galectin* | | *Opa1* | | *CG31064* | | *Diap2* | | *LpR2* | | *CG32486* | | | *CG12268* | | --- | | *CG32687* | | *Edg91* | | *Swim* | | *Hayan* | | *Lcp65Ad* | | *cdc14* | | *Jafrac1* | | *CG4615* | | *Bili* | | *dmGlut* | | *fend* | | *ths* | | *cpo* | | *PGRP-LC* | | *Aef1* | | *Prosbeta7* | | *CG6409* | | *Arpc5* | | *Nadsyn* | |
| adult | | *CG14834* | | --- | | *Muc12Ea* | | *yellow-g2* | | *Egm* | | *Cp7Fc* | | *CG5989* | | *Tsp96F* | | *CG8034* | | *Fis1* | | *CG10407* | | *yellow-g* | | *CG14615* | | *CG33714* | | *CG33713* | | *CG6724* | | *Nox* | | *CG4009* | | *CG1550* | | *CG2003* | | *slmo* | | | *CR42195* | | --- | | *CG8818* | | *CG12025* | | *lute* | | *CG7148* | | *CG13907* | | *18SrRNA-Psi:CR45861* | | *stmA* | | *CG42354* | | *mfrn* | | *CR41607* | | *CG3719* | | *CG33199* | | *l(1)G0136* | | *VhaPPA1-1* | | *CG4230* | | *CG11699* | | *jagn* | | *CG30345* | | *CG7120* | | | *DIP-alpha* | | --- | | *Iml1* | | *CG7484* | | *Bruce* | | *CG4615* | | *Vps13* | | *JHDM2* | | *CG12991* | | *CG45092* | | *chk* | | *CG7966* | | *lncRNA:CR44779* | | *GstT3* | | *CG32581* | | *CG10939* | | *CG42514* | | *Khc-73* | | *cwo* | | *gammaSnap1* | | *PhKgamma* | |
| Intron usage | Med | Eth | SAf |
| larva | | *tyf* | | --- | | *CG16758* | | *CG10508* | | *chk* | | *Mhc* | | *Ald1* | | *chic* | | *CG11873* | | *Nmda1* | | *wake* | | *wrd* | | *stumps* | | *Cul3* | | *CG8929* | | *Ndae1* | | *tou* | | *Jupiter* | | *His3.3B* | | *Lipringamma* | | *CG18809* | | *mgl*  *CG42674*  *Aldh-III*  *ena*  *CG17549*  *Dab*  *l(2)gl*  *Ndf*  *Pten*  *Sec31*  *Samuel*  *SclB*  *Ars2*  *Trxr-1*  *Saf-B*  *CG32137*  *plx*  *GstT3*  *Mf*  *sdk* | *Fur1*  *fwe*  *Dscam1*  *Synd*  *Tpi*  *Eip75B*  *wge*  *sals*  *sfl*  *Sap47*  *Arf51F*  *Btk29A*  *LRR*  *Task6*  *zormin*  *Usp47*  *mud*  *Dab*  *kmr*  *bbc* |
| pupa | | *CG31639* | | --- | | *CG31650* | | *ArfGAP1* | | *sws* | | *promL* | | *Pitslre* | | *Sod3* | | *Sf3b3* | | *DIP2* | | *Ucp4A* | | *smog* | | *MFS17* | | *stai* | | *nmo* | | *ATPCL* | | *Cht10* | | *hbs* | | *Gbeta13F* | | *Acsl* | | *B52* | | *mgl*  *Hsf*  *Ube4B*  *Hnf4*  *CG40498*  *gammaCOP*  *CG14767*  *Uck*  *E2f1*  *mfas*  *Trim9*  *Shab*  *Sec16*  *Nost*  *salto*  *Mical*  *DOR*  *CG5877*  *CG11597*  *lig* | | *Dgp-1* | | --- | | *Rpn13* | | *Rgk3* | | *CG17376* | | *CG34398* | | *Lmpt* | | *Rab14* | | *Pde1c* | | *rl* | | *chb* | | *obst-E* | | *CG42671* | | *CG45081* | | *GLaz* | | *dia* | | *yuri* | | *CG1275* | | *Mlp84B* | | *fwd* | | *vri* | |
| adult | | *whd* | | --- | | *wls* | | *Mlc1* | | *Prip* | | *PGRP-LC* | | *Fbl6* | | *bark* | | *NK7.1* | | *CG9812* | | *GramD1B* | | *gwl* | | *Gβ13F* | | *Rb97D* | | *CG17715* | | *cu* | | *Tm1* | | *CG4199* | | *UQCR-11* | | *Chc* | | *mthl10* | | | *CG34148* | | --- | | *raw* | | *CG1440* | | *Spn* | | *ATPsynE* | | *lncRNA:CR43144* | | *CG40498* | | *teq* | | *CG11309* | | *cu* | | *CG18135* | | *CG1637* | | *CG32549* | | *Fak* | | *Dab* | | *Sap47* | | *lig* | | *Sclp* | | *mtgo* | | *GLS* | | | *CG2911* | | --- | | *CkIIβ* | | *Vdup1* | | *Girdin* | | *Pep* | | *CG13921* | | *AnxB9* | | *CG9044* | | *Papss* | | *CG1146* | | *cmb* | | *tzn* | | *Sesn* | | *grp* | | *CG15514* | | *CG17544* | | *mu2* | | *Slik* | | *wnd* | | *dikar* | |

Table S9. Top 20 *PST* outliers (showing gene symbols) for each population/stage for expression abundance and for intron usage. The highlighted ones are shared between population pairs.

|  | MED | ETH | SAF |
| --- | --- | --- | --- |
| Genes expression outliers | | | |
| larva | | 1.envelope | | --- | | 2.mitochondrial inner membrane | | 3.mitochondrial membrane | | 4.mitochondrial membrane part | | 5.mitochondrial part | | 6.mitochondrial protein complex | | 7.mitochondrion | | 8.organelle inner membrane | | 9.proton-transporting ATP synthase  complex | | NA | | 1.aminoacyl-tRNA ligase activity | | --- | | 2.extracellular space | | 3.hydrolase activity,  acting on glycosyl bonds | | 4.ligase activity, forming  aminoacyl-tRNA  and related compounds | | 5.microtubule associated complex | |
| pupa | | 1.ATP metabolic process | | --- | | 2.ATP synthesis coupled electron  transport | | 3.cellular respiration | | 4.cytosolic large ribosomal subunit | | 5.electron carrier activity | | 6.lectron transport chain | | 7.energy derivation by oxidation of  organic compounds | | 8.glycosyl compound metabolic process | | 9.inner mitochondrial membrane  protein complex | | 10.large ribosomal subunit | | 11.mitochondrial ATP synthesis  coupled electron transport | | 12.mitochondrial envelope | | 13.mitochondrial inner membrane | | 14.mitochondrial membrane | | 15.mitochondrial protein complex | | 16.mitochondrial respiratory chain | | 17.mitochondrion | | 18.negative regulation of developmental  process | | 19.nucleoside metabolic process | | 20.nucleoside triphosphate metabolic  process | | 21.organelle inner membrane | | 22.oxidative phosphorylation | | 23.oxidoreductase complex | | 24.purine nucleoside metabolic process | | 25.purine ribonucleoside metabolic  process | | 26. respiratory chain | | 27.respiratory chain complex | | 28.respiratory electron transport chain | | 29.ribosome  30. ribonucleotide metabolic process | | | 1.cellular chemical homeostasis | | --- | | 2.cellular homeostasis | | 3.cellular ion homeostasis | | 4.coenzyme biosynthetic process | | 5.cofactor biosynthetic process | | 6.ion homeostasis | | 7.monovalent inorganic cation  homeostasis | | 8.regulation of pH | | | 1.anion:cation symporter activity | | --- | | 2.endopeptidase activity | | 3.extracellular matrix | | 4.extracellular region | | 5.inorganic anion transmembrane  transporter activity | | 6.inorganic anion transport | | 7.peptidase activity | | 8.proteasome complex | | 9.proteasome core complex | | 10.secondary active  transmembrane transporter activity | | 11.solute:cation symporter activity | | 12.structural constituent of  chitin-based cuticle | | 13.structural constituent of cuticle | | 14.symporter activity | | 15.threonine-type endopeptidase  activity | |
| adult | | 1.anatomical structure formation  involved in morphogenesis | | --- | | 2.cellular component assembly  involved in morphogenesis | | 3.chorion | | 4.chorion-containing eggshell formation | | 5.columnar/cuboidal epithelial cell  differentiation | | 6.egg coat formation | | 7.eggshell chorion assembly | | 8.epithelial cell development | | 9.external encapsulating structure | | 10.extracellular matrix assembly | | 11.fatty acid biosynthetic process | | 12.glycosyl compound metabolic process | | 13.lipid particle | | 14.mitochondrion  15.monocarboxylic acid biosynthetic  process | | 16.monocarboxylic acid metabolic  process | | 17.nucleoside metabolic process  18.ovarian follicle cell development | | 19.oxidation-reduction process  20.purine nucleoside metabolic process  21.pyruvate metabolic process | | 22.ribonucleoside metabolic process  23.structural molecule activity | | 24.vitelline membrane formation | | | 1.ATP hydrolysis coupled  transmembrane transport | | --- | | 2.ATP metabolic process | | 3.ATP synthesis coupled electron  transport | | 4.calmodulin binding | | 5.carbohydrate derivative metabolic  process | | 6.cell adhesion molecule binding | | 7.cellular respiration | | 8.electron transport chain | | 9.energy coupled proton  transmembrane transport,  against electrochemical gradient | | 10.energy derivation by oxidation of  organic compounds | | 11.envelope | | 12. glycosyl compound metabolic  process | | 13.hydrogen transport | | 14.hydrogen-exporting ATPase activity | | 15.inner mitochondrial membrane  protein complex | | 16.mitochondrial ATP synthesis  coupled electron transport | | 17.mitochondrial envelope | | 18.mitochondrial inner membrane | | 19.mitochondrial membrane | | 20.mitochondrial part | | 21.mitochondrial respiratory chain | | 22.vacuolar membrane | | 23.mitochondrion  24.NADH dehydrogenase activity | | 25.NADH dehydrogenase complex | | 26.negative regulation of  transmembrane receptor protein serine  /threonine kinase signaling pathway | | 27.nucleobase-containing small  molecule metabolic process | | 28.nucleoside metabolic process  29.nucleoside phosphate metabolic  process | | 30.organelle envelope | | 31.organelle membrane | | 32.organophosphate metabolic process | | 33.oxidation-reduction process  34.oxidative phosphorylation | | 35.oxidoreductase complex | | 36.phosphorylation | | 37.proton transport | | 38.proton-transporting V-type ATPase  complex | | 39.purine nucleoside metabolic process  40.purine ribonucleoside metabolic  process | | 41. respiratory chain | | 42.respiratory electron transport chain | | 43.response to oxidative stress | | 44.ribonucleoside metabolic process | | 45.ribose phosphate metabolic process | |  | | NA |
|  |  |  |  |
| Genes with exon usage outlier | | | |
| larva | NA | NA | 1. meiotic cell cycle |
| pupa | NA | NA | NA |
| adult | NA | NA | NA |

Table S10. The significant GO terms for expression and intron usage *PST* outliers for different population pairs at three developmental stages. The highlighted GO terms are shared between the MED and ETH pairs.

| pair | Intron type | Total tests | Cis only | Trans only | Both co-dir | Both anti-dir | Neither |
| --- | --- | --- | --- | --- | --- | --- | --- |
| MED | *PST* outliers | 5 | 0 | 0 | 0 | 1 (20%) | 4 (80%) |
|  | Non-outliers | 57 | 0 | 7 (12%) | 0 | 6 (11%) | 44 (77%) |
| ETH | *PST* outliers | 7 | 1 (14%) | 1 (14%) | 0 | 0 | 5 (71%) |
|  | Non-outliers | 35 | 3 (9%) | 2 (6%) | 0 | 9 (26%) | 20 (57%) |
| SAF | *PST* outliers | 5 | 1 (20%) | 1 (20%) | 0 | 1 (20%) | 2 (40%) |
|  | Non-outliers | 76 | 3 (4%) | 6 (8%) | 1 (1%) | 13 (17%) | 51 (67%) |

Table S12. Numbers of intron usage traits showing different regulatory effects for *PST* outliers and non-outliers. The percentage in parentheses indicates the fraction of introns in each category relative to the total introns in the tests.

**SUPPLEMENTARY TEXT:**

*Simulations to test the resampling based approach for testing cis- and trans-regulatory divergence*

For gene expression, we simulated a gene of 500bp with five fully linked informative SNPs; each of them was located randomly in a 100bp interval. Because of the of heterozygosity within our inbred lines (Lack et al. 2015), we simulated two simple situations: 1. All five SNPs were fixed differences between parents; 2. All five SNPs were heterozygous (50% allele frequency) and fully linked in one parent and fixed in the other. Then the expression level of the two parents (*Ec* and *Ew*) was simulated based on different values of *rF0* (the ratio of the cold parental strain expression to the total expression of both parental strains. *rF0* = *Ec’/(Ec’*+ *Ew*) and average read number using binomial sampling. The read number was set as 200 or 500 for expression; and 20 or 50 for splicing. The *rF0* was set as 0.6, 0.7 and 0.8 for both expression and splicing. Because the splicing frequency is bounded between 0 and 1, for simplicity, we assume the sum of splicing frequency in cold strain and warm strain is 1. Then from each of those parents, 30 alleles (as in our experimental design) or 300 alleles were randomly sampled to generate 60 or 600 F1. For the parents with a fixed SNP difference, the F1 offspring were always heterozygous (50% allele frequency). For splicing, we simulated an exon-junction region of 100bp with one informative SNP.

Next, we simulated the reads for the F1 offspring and two parental strains based on two simple conditions: the expression/intron usage difference between parents was only due to a *cis*-effect or only due to a *trans*-effect. The reads were 75 bp paired reads. For *cis*-effect only simulations, the effect size of each allele was calculated based on the *rF0* we set (e.g., if *rF0*=0.7, the effect size of a T allele is 0.15 and a C allele is 0.55). Then we randomly sampled the reads with different alleles, weighted by the allele frequencies and effect sizes in F1 offspring as well as in the parents (for parents with a fixed SNP difference, the frequency of reads with certain alleles were unaffected by sampling). For *trans*-effect only simulations, because the expression difference between the parents was due to unlinked background effects, the alleles did not have an effect size. Reads with certain alleles were sampled randomly weighted by their frequencies in F1 offspring and parents. For each of the combinations of *rF0*, read numbers, F1 individuals and *cis*/*trans*-regulatory condition, we generated 1000 simulations.

To test our analysis approach using the simulated data, we mapped the simulated reads to the gene/intron in F1 and parental individuals. For the case of parents with fixed SNP differences, we sampled randomly with replacement for the F1 reads mapped to each gene/intron to calculate the median average allele frequency for all sites *pF1’*. To account for the measurement uncertainty in F1 expression, we repeated the process 1000 times to get a distribution of *pF1’*. If the 95% confidence interval of the distribution did not overlap with 0.5, this was deemed a significant *cis*-effect. For *trans*-effects, we further accounted for the uncertainty in estimating the expression level in parental strains by sampling reads with a probability based on the proportion of reads for that gene/intron relative to total reads (100,000 reads per sample in the simulation). Using the new level of expression for the parental strains we calculated the updated *rF0*’. We repeated the sampling and calculation 1000 times. Each time the *rF0*’ was paired with a *pF1*’ described above to calculate the difference between them (*D*’). If a 95% confidence interval of *D*’ did not overlap with 0, a significant *trans*-effect was called.

To examine the sensitivity and specificity of the analysis approach, we applied it on our 1000 *cis*-only simulations and 1000 *trans*-only simulations. For *cis*-only simulations, the proportion that did not show a significant *cis*-effect is the *cis* false negative rate; the proportion that showed a significant *trans*-effect is the *trans* false positive rate. For trans-only simulations, the proportion that did not show a significant *trans*-effect is the *trans* false negative rate; the proportion that showed a significant *cis*-effect is the *cis* false positive rate. For gene expression, we found the false positive rates were generally < 5%, but the false negative rate was quite high, especially for trans-effects (Table S13). These results suggested that our approach has lower power for *trans*-effects than *cis*-effects. Similarly, for splicing, the *trans*-effects had a higher false negative rate, although it showed a slightly higher false positive rate than the *cis*-effect and above 5% (Table S14), indicating our approach has different specificity for different traits.

| fixed parental SNP difference | | *cis*-only simulation | | *trans*-only simulation | |
| --- | --- | --- | --- | --- | --- |
| reads | *rF0* | False *cis* negative | False *trans* positive | False *trans* negative | False *cis* positive |
| 200 | 0.6 | 0.44 | 0.002 | 0.956 | 0.024 |
| 200 | 0.7 | 0.028 | 0 | 0.359 | 0.027 |
| 200 | 0.8 | 0.001 | 0.002 | 0.007 | 0.019 |
| 500 | 0.6 | 0.141 | 0.002 | 0.705 | 0.018 |
| 500 | 0.7 | 0 | 0.007 | 0.003 | 0.025 |
| 500 | 0.8 | 0 | 0.011 | 0 | 0.025 |

Table S13. The false positive and negative rate for detecting *cis*- and *trans*-effect of our method based on the simulated datasets for gene expression.

| fixed parental SNP difference | | *cis*-only simulation | | *trans*-only simulation | |
| --- | --- | --- | --- | --- | --- |
| reads | *rF0* | False *cis* negative | False *trans* positive | False *trans* negative | False *cis* positive |
| 20 | 0.6 | 0.885 | 0.054 | 0.905 | 0.033 |
| 20 | 0.7 | 0.575 | 0.061 | 0.764 | 0.036 |
| 20 | 0.8 | 0.047 | 0.101 | 0.485 | 0.045 |
| 50 | 0.6 | 0.760 | 0.066 | 0.834 | 0.034 |
| 50 | 0.7 | 0.251 | 0.063 | 0.511 | 0.054 |
| 50 | 0.8 | 0.023 | 0.090 | 0.177 | 0.042 |

Table S14. The false positive and negative rates for detecting *cis*- and *trans*-effects of our method based on the simulated datasets for splicing.

To generalize our approach to using heterozygous informative SNPs, we used a parental ancestry proportion statistic (*f*) to study allele-specific expression. The parental proportion in gene expression level/intron usage in the F1 RNA-seq sample was estimated as

*f* = (*pF1* – *pw*)/(*pc – pw*)

where *pF1* is the allele frequency in the RNA reads for the F1 sample. To test for a *cis*-effect, *pc* and*pw* are the allele frequencies in the genomic reads for the cold- and warm-adapted parental lines respectively. To test for a *trans*-effect, *pc* and*pw* are the allele frequencies in the expression reads for the parents. The parental proportion for each candidate gene was the average *f* for all sites located in the gene ().

We attempted to account for different types of uncertainty on estimating *f*. The first factor was the uncertainty in estimating parental strain frequencies *pc* and*pw* from the genomic or expression data. For each SNP used in the calculation, we resampled 30 alleles from the heterozygous parent until reaching the set read number, representing the 30 F1 individuals. Then we recalculated the *pc’* and *pw’*. To account for the measurement uncertainty in F1 expression, we sampled with replacement for the F1 reads mapped to each gene until we reached the total numbers of mapped reads. Then we recalculated the *pF1’* for each SNP and together with *pc’* and *pw’* calculated the *’* for each gene. We repeated the above process 1000 times to get a distribution of *’.* A 95% confidence interval of the distribution not overlapping with 0.5 suggested the existence of a *cis*-effect.

Similar to the approach based on SNPs with a fixed difference, for *trans*-effects, the uncertainty on estimating the expression level in parental strains needs to be accounted for. We resampled reads with a probability based on the proportion of reads for that gene/intron relative to total reads (100,000 reads per sample in the simulation). Using the new level of expression for the parental strains we calculated the updated *rF0*’. We repeated the sampling and calculation 1000 times. Each time the *rF0*’ was paired with a *’* to calculate the difference between them (*D*’). A 95% confidence interval of the *D*’ distribution not overlapping with 0 suggested the significance of trans-effect.

However, we found the approach using within-strain polymorphic sites resulted in very high false positive rates for both gene expression and splicing (Table S15; Table S17). A major reason is that producing F1 offspring from the heterozygous parent causes random deviations from the expected F1 genotype frequency. Since we only included 30 F1 individuals in the experiment, there is a strong sampling effect. If we increased the number of F1 individuals to 300, the false positive rates were reduced significantly (Table S16; Table S18). Therefore, in order to use within-strain polymorphic sites to study *cis*- and *trans*-effects in this type of experiment, we recommend collecting RNA-seq data from a large number of F1 individuals.

| 30 alleles |  | cis-only simulation | | trans-only simulation | |
| --- | --- | --- | --- | --- | --- |
| reads | *rF0* | False *cis* negative | False *trans* positive | False *trans* negative | False *cis* positive |
| 200 | 0.6 | 0.202 | 0.087 | 0.859 | 0.1 |
| 200 | 0.7 | 0.005 | 0.109 | 0.643 | 0.102 |
| 200 | 0.8 | 0 | 0.097 | 0.389 | 0.103 |
| 500 | 0.6 | 0.122 | 0.161 | 0.78 | 0.133 |
| 500 | 0.7 | 0 | 0.185 | 0.447 | 0.121 |
| 500 | 0.8 | 0 | 0.193 | 0.205 | 0.153 |

Table S15. The false positive and negative rates for detecting cis- and trans-effects using a within-parent polymorphic site based on 30 F1 individuals for gene expression.

| 300 alleles |  | cis-only simulation | | trans-only simulation | |
| --- | --- | --- | --- | --- | --- |
| reads | *rF0* | False *cis* negative | False *trans* positive | False *trans* negative | False *cis* positive |
| 200 | 0.6 | 0.088 | 0.025 | 0.848 | 0.036 |
| 200 | 0.7 | 0 | 0.019 | 0.454 | 0.038 |
| 200 | 0.8 | 0 | 0.025 | 0.132 | 0.043 |
| 500 | 0.6 | 0.012 | 0.055 | 0.635 | 0.028 |
| 500 | 0.7 | 0 | 0.042 | 0.108 | 0.033 |
| 500 | 0.8 | 0 | 0.029 | 0.006 | 0.022 |

Table S16. The false positive and negative rates for detecting *cis*- and *trans*-effects using a within-parent polymorphic site based on 300 F1 individuals for gene expression.

| 30 alleles |  | cis-only simulation | | trans-only simulation | |
| --- | --- | --- | --- | --- | --- |
| reads | *rF0* | False *cis* negative | False *trans* positive | False *trans* negative | False *cis* positive |
| 200 | 0.6 | 0.755 | 0.254 | 0.855 | 0.067 |
| 200 | 0.7 | 0.435 | 0.191 | 0.793 | 0.080 |
| 200 | 0.8 | 0.026 | 0.218 | 0.728 | 0.082 |
| 500 | 0.6 | 0.651 | 0.202 | 0.884 | 0.068 |
| 500 | 0.7 | 0.158 | 0.166 | 0.812 | 0.064 |
| 500 | 0.8 | 0.013 | 0.192 | 0.650 | 0.068 |

Table S17. The false positive and negative rates for detecting *cis*-and *trans*-effects using a within-parent polymorphic site based on 30 F1 individuals for splicing.

| 300 alleles |  | cis-only simulation | | trans-only simulation | |
| --- | --- | --- | --- | --- | --- |
| reads | *rF0* | False *cis* negative | False *trans* positive | False *trans* negative | False *cis* positive |
| 200 | 0.6 | 0.720 | 0.264 | 0.830 | 0.050 |
| 200 | 0.7 | 0.465 | 0.167 | 0.779 | 0.059 |
| 200 | 0.8 | 0.019 | 0.189 | 0.708 | 0.057 |
| 500 | 0.6 | 0.667 | 0.110 | 0.883 | 0.032 |
| 500 | 0.7 | 0.077 | 0.131 | 0.813 | 0.019 |
| 500 | 0.8 | 0.010 | 0.134 | 0.716 | 0.041 |

Table S18. The false positive and negative rates for detecting *cis*-and *trans*-effects using a within-parent polymorphic site based on 300 F1 individuals for splicing.
